# Supplementary material for: Marshalin, a microtubule minus-end binding protein, regulates cytoskeletal structure in the organ of Corti
Source: PubMed Central journal article supplement (PMC3828766; doi:10.1242/bio.20135603), 2013-09-17
Supplement: supp_bio.20135603_bio.20135603-s1.pdf [file supp_bio.20135603_bio.20135603-s1.pdf]

Supplementary Material

Jing Zheng et al. doi: 10.1242/bio.20135603

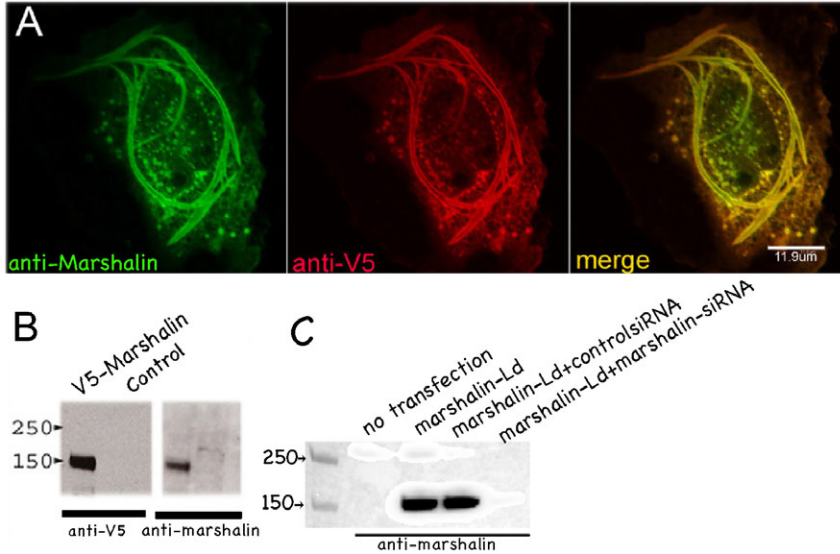

**Fig. S1. Specificity of anti-marshalin.** *Marshalin-Ld* (~3759 bp) cloned from the mouse cochlea was inserted into a mammalian expression vector with a V5-His epitope downstream of and in-frame with *marshalin-Ld*.

(A) Immunofluorescent images of marshalin-Ld-expressing OK cells labeled with anti-marshalin (left, green) and anti-V5 (middle, red), which recognizes the V5-tag at the C-terminus end of the marshalin protein. The right image superimposes green and red images to indicate that the staining for V5 and marshalin overlap. Scale bar: 10  $\mu$ m.

(B) Western blot for marshalin-Ld-V5-His-expressing OK cells (V5-marshalin) vs untransfected cells (control). The marshalin-Ld protein band on SDS-PAGE was recognized by both anti-V5 and anti-marshalin. (C) Marshalin siRNA mediated knockdown of marshalin expression. OK cells were transfected with one of the following combinations: (1) Marshalin-Ld plasmid alone. (2) Marshalin plasmid plus negative control siRNA. (3) Marshalin-Ld plus marshalin siRNA.

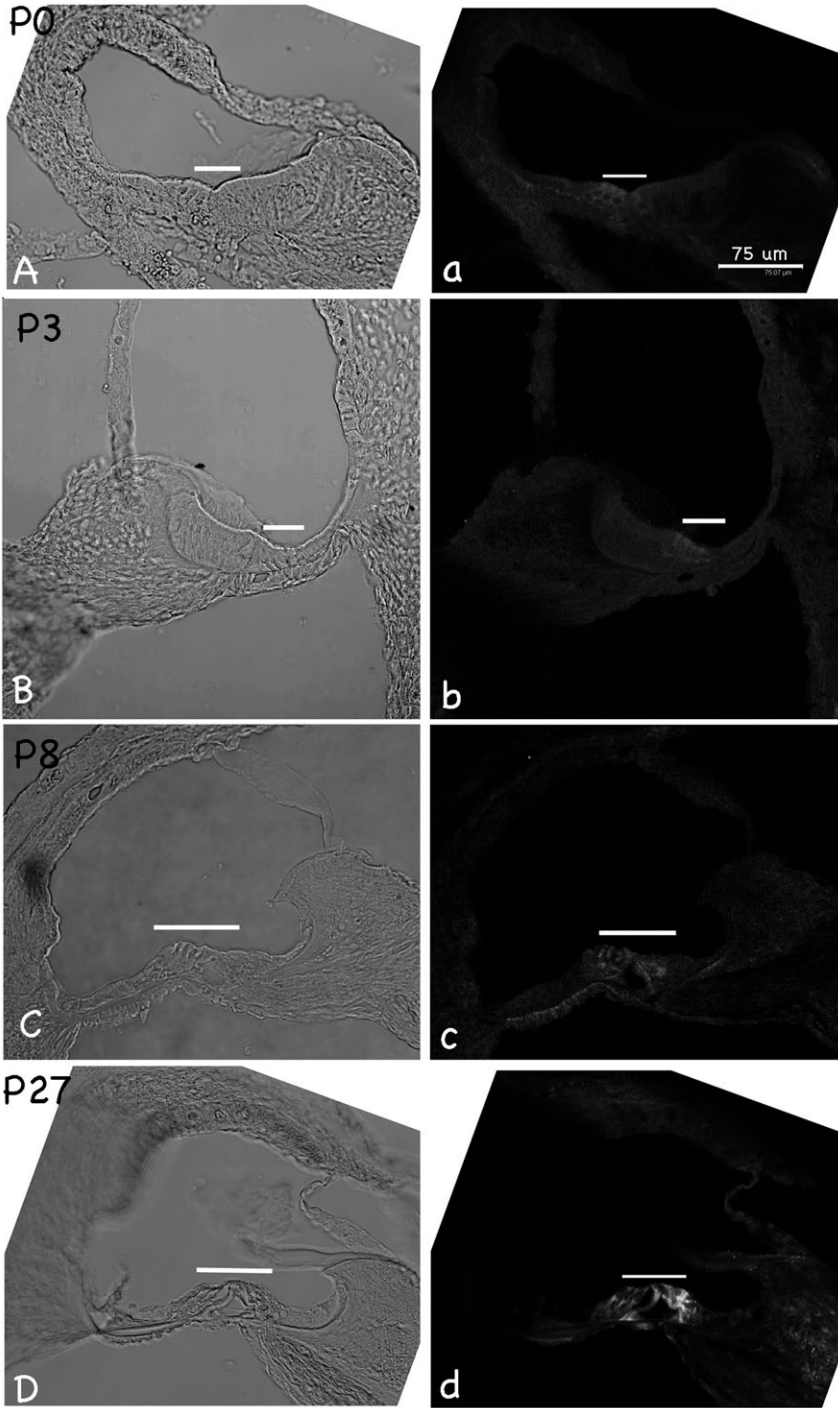

**Fig. S2. Marshalin protein expression at different developmental stages.** Anti-marshalin immunofluorescent images were taken at low magnification to emphasize that expression is restricted to the organ of Corti. (A) P0; (B) P3; (C) P8; (D) P27. Corresponding light microscope images appear on the left hand side. White bars overlies the OC region. Negative controls using anti-marshalin pre-incubated with antigen peptide or no anti-marshalin both lacked staining. Scale bar: 75  $\mu$ m.

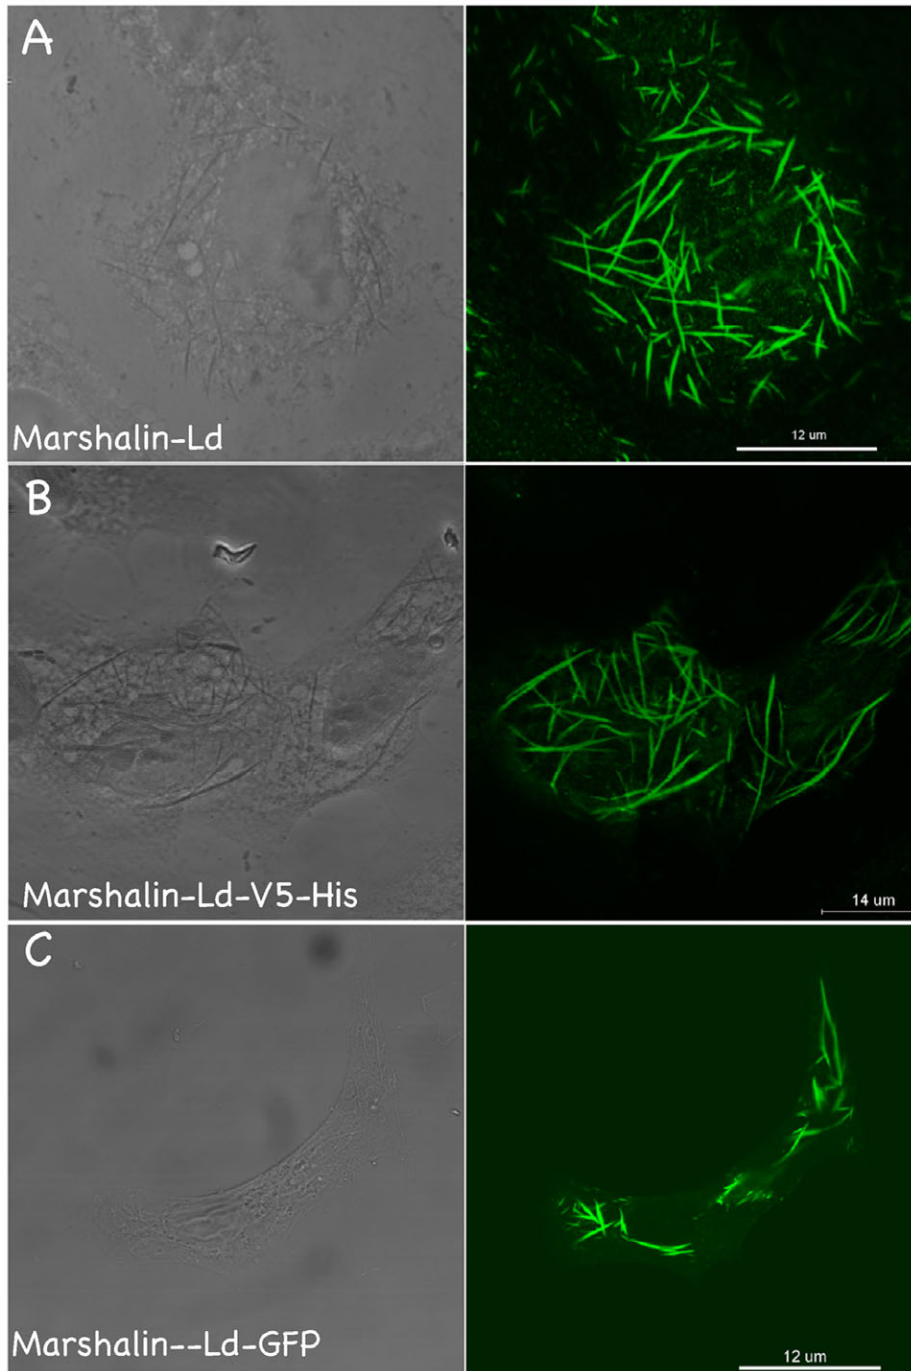

**Fig. S3. V5 and GFP tags do not affect MT bundle formations.** OK cells were transfected with plasmids encoding (A) *marshalin-Ld* with no tag; (B) *marshalin-Ld* with a V5-His tag; (C) *marshalin-Ld* with a GFP tag. Images were taken 48 hrs after transfection with different plasmids. Scale bars: 12 μm (A,C), 14 μm (B).

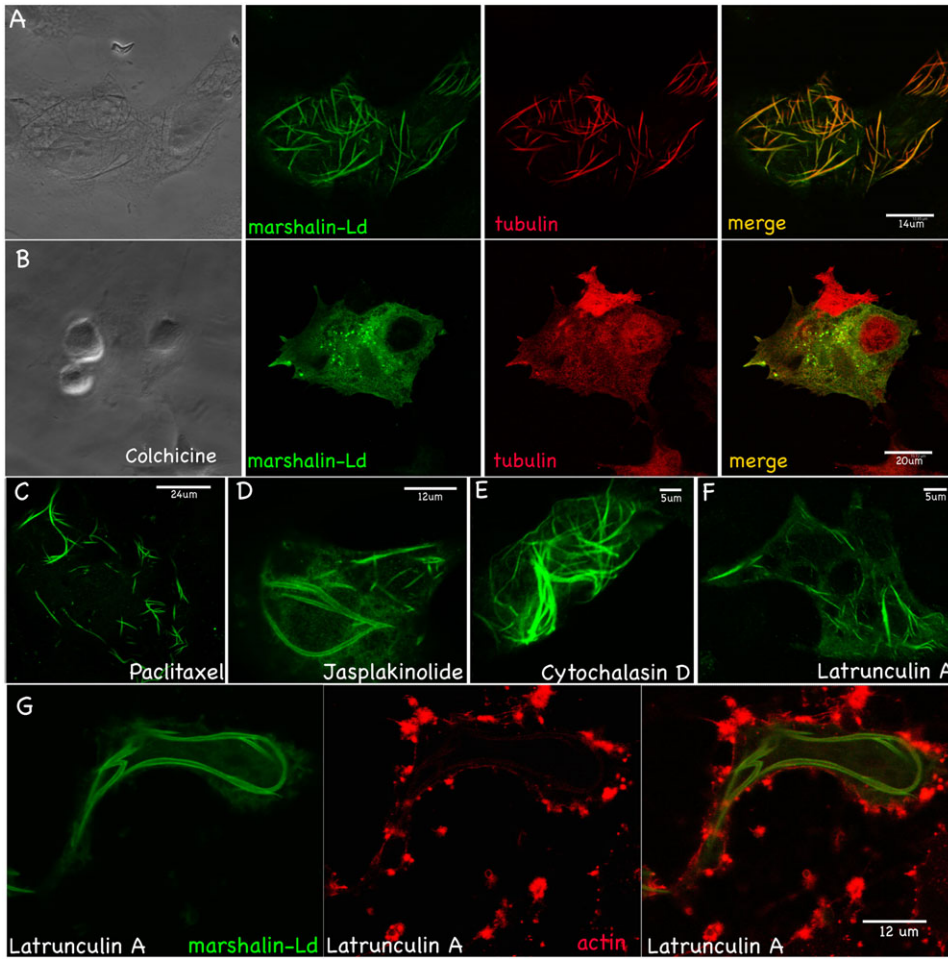

**Fig. S4. MT bundles induced by *marshalin-Ld* cDNA.** Marshalin-Ld-V5-expressing OK cells stained with anti-V5 for detecting marshalin (green) in panels A–G, anti- $\alpha$ -tubulin for detecting MTs (red) in panels A–F, and Texas Red-X phalloidin for actin filaments in panel G. All images acquired 48 hrs post transfection. (A) Cells without drug treatment. (B) Cells treated with 250 ng/ $\mu$ l colchicine, a microtubule polymerization inhibitor, for 24 hrs. (C) Cells treated with 0.5  $\mu$ M paclitaxel, a microtubule stabilizer, for 3 hrs. (D) Cells treated with 10 nM jasplakinolide, which increases actin filament assembly, for 24 hrs. (E) Cells treated with 0.5  $\mu$ M cytochalasin D, which inhibits actin polymerization, for 24 hrs. (F) Cells treated with 0.25  $\mu$ M latrunculin A for 24 hrs, which also inhibits actin polymerization as shown in panel G. Scale bars: 14  $\mu$ m (A), 20  $\mu$ m (B), 24  $\mu$ m (C), 12  $\mu$ m (D,G), 5  $\mu$ m (E,F).

**Table S1. Marshalin isoforms and their accessory numbers.**

| Name              | Exons                                     | Amino acids | Accession number         |
|-------------------|-------------------------------------------|-------------|--------------------------|
| Marshalin-La (v1) | 19 exons: Exon1-19                        | 1280 aa     | KC426930                 |
| Marshalin-La (v2) | 19 exons: Exon1-19                        | 1279 aa     | KC426931                 |
| Marshalin-Lb (v1) | 18 exons: Exon1-4, E6-19                  | 1269 aa     | KC426932                 |
| Marshalin-Lb (v2) | 18 exons: Exon1-4, E6-19                  | 1268 aa     | KC426933                 |
| Marshalin-Lc (v1) | 18 exons: Exon1-5, E7-19                  | 1264 aa     | KC426934                 |
| Marshalin-Lc (v2) | 17 exons: Exon1-5, E7-19                  | 1263 aa     | KC426935                 |
| Marshalin-Ld (v1) | 17 exons: Exon1-4, E7-19                  | 1253 aa     | KC426936, NM_001163749.1 |
| Marshalin-Ld (v2) | 17 exons: Exon1-4, E7-19                  | 1252 aa     | KC426937, NM_027171.3    |
| Marshalin-Sa (v1) | 19 exons: Exon1-19 (partial Exon13)       | 864 aa      | KC426938                 |
| Marshalin-Sa (v2) | 19 exons: Exon1-19 (partial Exon13)       | 863 aa      | KC426939                 |
| Marshalin-Sb (v1) | 18 exons: Exon1-4, E6-19 (partial Exon13) | 853 aa      | KC426940                 |
| Marshalin-Sb (v2) | 18 exons: Exon1-4, E6-19 (partial Exon13) | 852 aa      | KC426941                 |
| Marshalin-Sc (v1) | 18 exons: Exon1-5, E7-19 (partial Exon13) | 848 aa      | KC426942                 |
| Marshalin-Sc (v2) | 17 exons: Exon1-5, E7-19 (partial Exon13) | 847 aa      | KC426943                 |
| Marshalin-Sd (v1) | 17 exons: Exon1-4, E7-19 (partial Exon13) | 837 aa      | KC426944                 |
| Marshalin-Sd (v2) | 17 exons: Exon1-4, E7-19 (partial Exon13) | 836 aa      | KC426945                 |

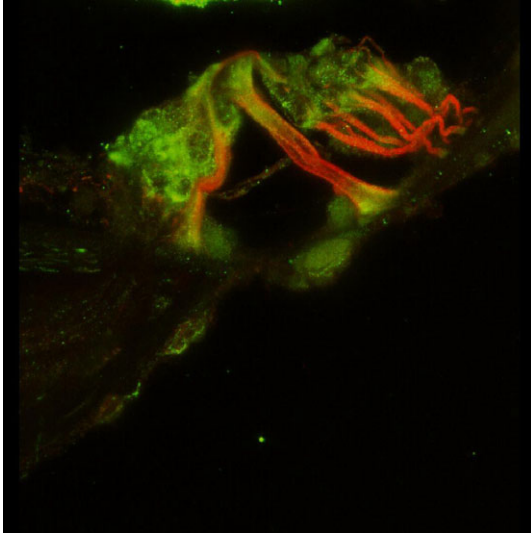

**Movie 1. 3D-movie showing the location of marshalin in the organ of Corti.** Thirty individual images were collected from a P27 mouse cochlea at intervals of 0.15  $\mu\text{m}$  per section. The movie was created using ImageJ.
